# Supplementary material for: Evidence for resource transfer via common endophyte networks
Source: Research Square preprint supplement (doi:10.21203/rs.3.rs-8288489/v1), 2025-12-19
Supplement: Supplementary file 1 [file 13ee79864facb2c8c58f7a1b.pdf]

## Supplementary Materials

### Evidence for resource transfer via common endophyte networks

Philipp Waschk<sup>1,\*</sup>, Philipp Spiegel<sup>1</sup>, Arthur Gessler<sup>2,3</sup>, Matthias Sauer<sup>2</sup>, Beatrice M. Bock<sup>4,5</sup>, Wolfgang Hinterdobler<sup>6</sup>, Mark A. Anthony<sup>1,\*</sup>

<sup>1</sup> Center for Microbiology and Environmental Systems Science, University of Vienna, Vienna, Austria.

<sup>2</sup> Swiss Federal Institute for Forest, Snow, and Landscape Research (WSL), Birmensdorf, Switzerland

<sup>3</sup> Department of Environmental Systems Science, ETH Zürich, Zürich, Switzerland.

<sup>4</sup> Department of Biological Sciences, Northern Arizona University, Flagstaff, AZ, USA

<sup>5</sup> Center for Adaptable Western Landscapes, Northern Arizona University, Flagstaff, AZ, USA

<sup>6</sup> MyPilz GmbH, Vienna, Austria

\* Correspondence should be addressed to these authors: Mark A. Anthony ([mark.anthony@univie.ac.at](mailto:mark.anthony@univie.ac.at)), Philipp Waschk ([philippwaschk@gmail.com](mailto:philippwaschk@gmail.com))

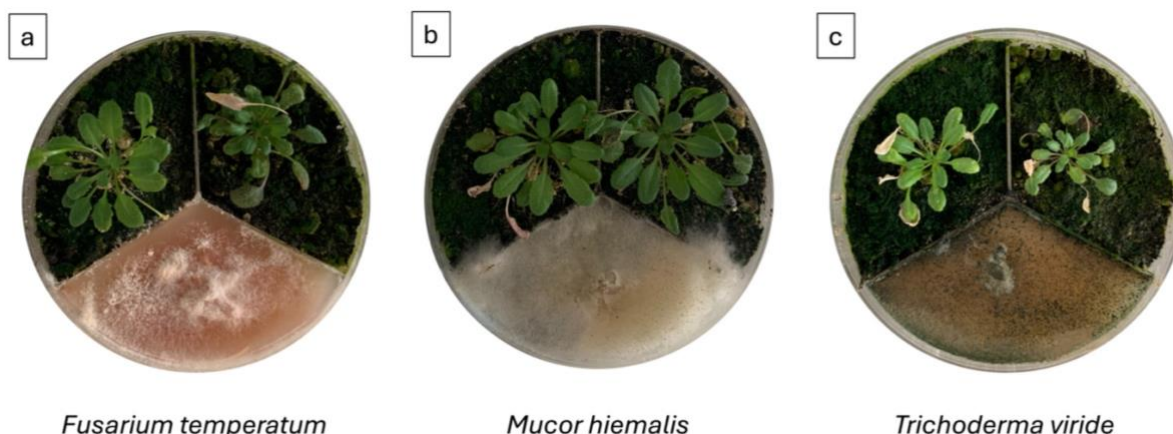

**Supplement Figure 1: Pictures of the inoculated plates.** Images were taken right before sampling. Inoculation with *F. temperatum* (a), *Mucor hiemalis* (b) and *T. viride* (c).

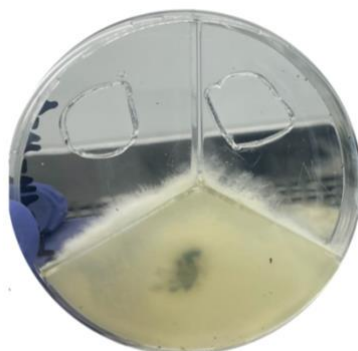

**Supplement Figure 2: Pictures of the overgrowth of the internal barriers by *Mucor hiemalis*.**

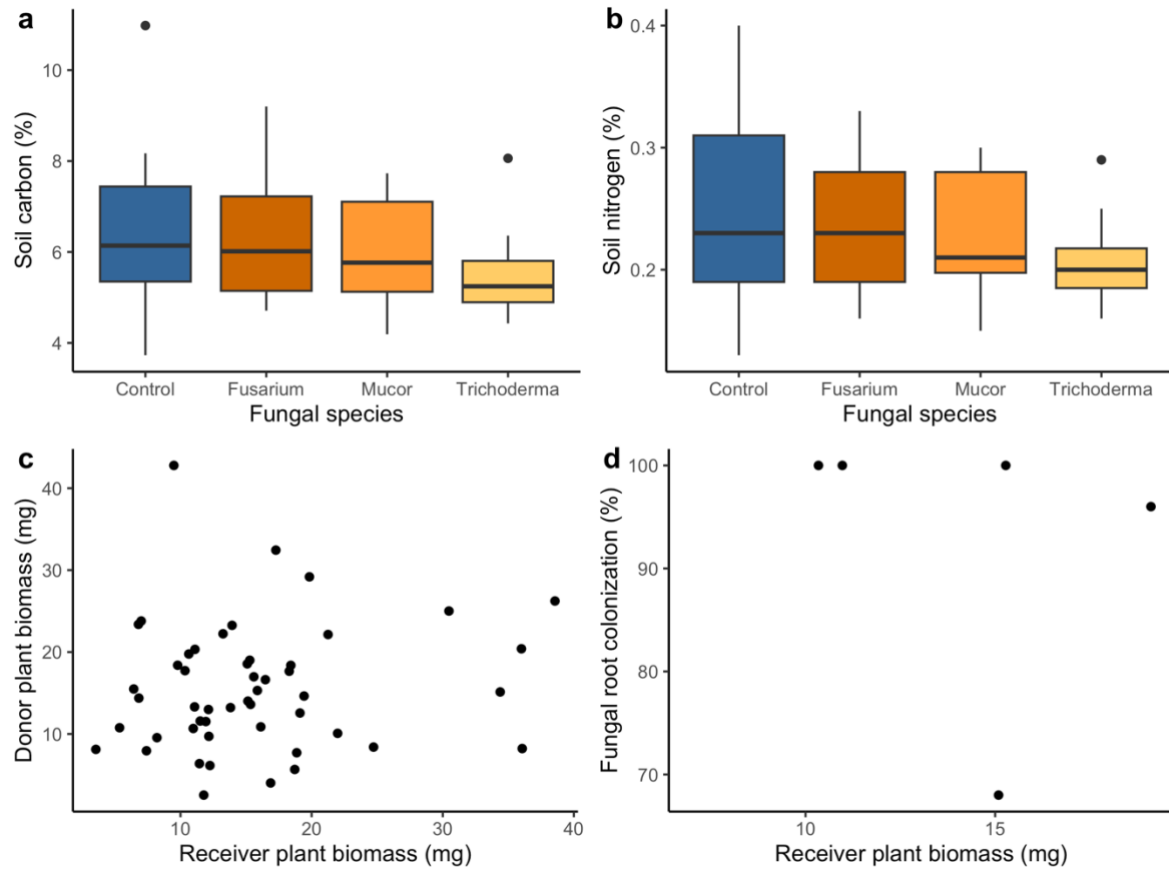

**Supplement Figure 3: Validation of the experimental system.** Fertility of the receiver soils as total carbon and nitrogen (**a**, **b**). Correlation of the biomasses of the donor and receiver plant ( $p = 0.43$ ,  $R = 0.11$ )(**c**). Correlation of fungal root colonization and plant biomass of only control treatments ( $p = 0.7$ ,  $R = -0.25$ )(**d**).

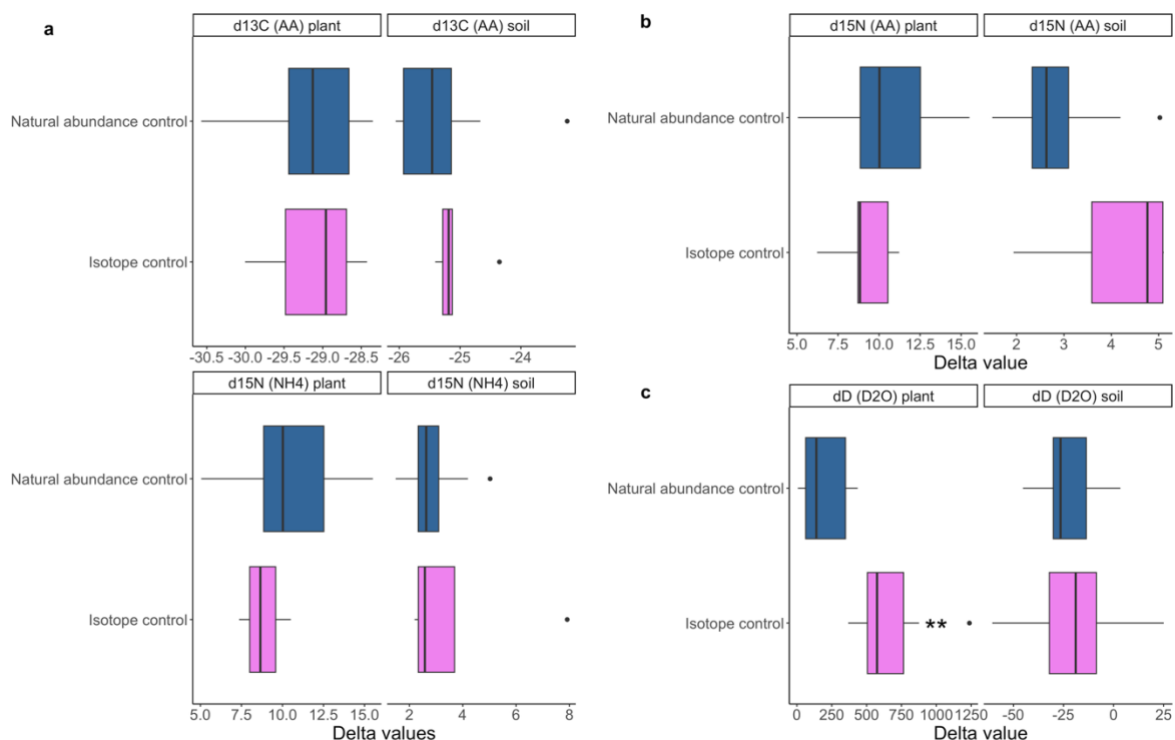

**Supplement Figure 4: Comparison of isotope and natural abundance controls.** Comparison of isotope and natural abundance controls of the control plates where  $^{13}\text{C}$  was added as amino acids and  $^{15}\text{N}$  as ammonium (a). Comparison of isotope and natural abundance controls of the control plates where  $^{15}\text{N}$  was added as amino acids (b). Comparison of isotope and natural abundance controls of the control plates where deuterium was added as  $\text{D}_2\text{O}$  showing significantly more  $\delta\text{D}$  in the isotope control compared to the natural abundance control ( $p = 0.0007$ ) (c). (\*\* means  $p \leq 0.01$ ).

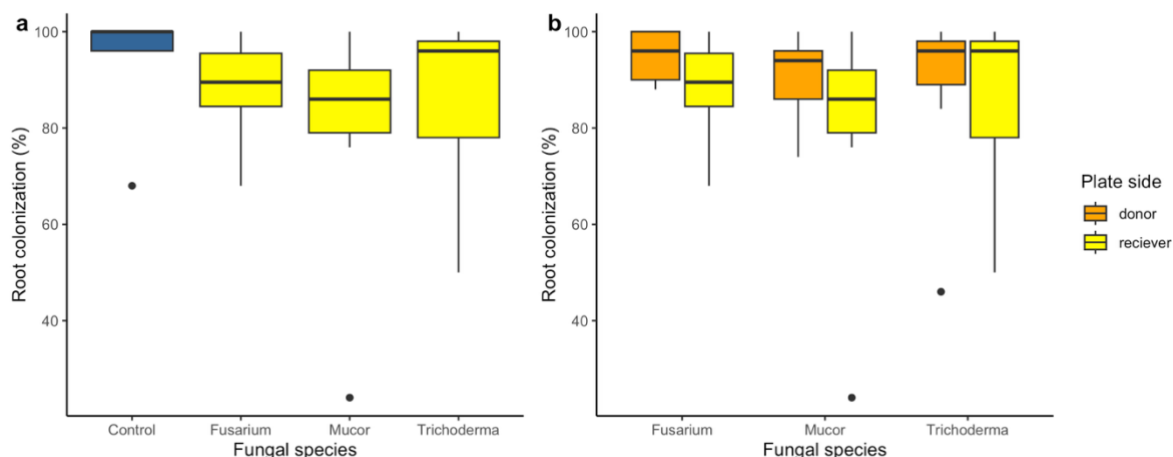

**Supplement Figure 5: Fungal root colonization.** Comparison of fungal root colonization of receiver plants to the natural abundance control by endophyte species (a). Comparison of fungal root colonization of receiver and donor plants by endophyte species (b).

**Supplement Table 1: Statistical values (Correlations, t-tests).** Table of correlations and t-tests showing comparison references and corresponding p-values and R-values (blue means  $p \leq 0.05$ ; violet means  $p \leq 0.01$ ).

| Statistical method         | Comparison reference 1                                                                    | Comparison reference 2                                                                     | p          | R          |
|----------------------------|-------------------------------------------------------------------------------------------|--------------------------------------------------------------------------------------------|------------|------------|
| Pearson correlation        | Donor plant                                                                               | Receiver plant                                                                             | 0.4326     | 0.1134861  |
| Pearson correlation        | Fungal root colonization of reciever plants (only control)                                | Plant biomass                                                                              | 0.6878     | -0.2477715 |
| Pearson correlation        | Fungal root colonization of reciever plants (only fungal inoculations)                    | Plant biomass                                                                              | 0.01106    | 0.5091308  |
| One-sided Welch's t-test   | Plant biomass ( <i>Fusarium temperatum</i> )                                              | Plant biomass (Natural abundance control)                                                  | 0.01387    |            |
| One-sided Welch's t-test   | Plant biomass ( <i>Trichoderma viride</i> )                                               | Plant biomass (Natural abundance control)                                                  | 0.07448    |            |
| One-sided Student's t-test | Total nitrogen content ( <i>Mucor hiemalis</i> ) in plants (plates with receiver plants)  | Total nitrogen content (Natural abundance control) in plants (plates with receiver plants) | 0.001003   |            |
| Two-sided Student's t-test | $\delta D(D_2O)$ (Natural abundance control) in plants (plates with receiver plants)      | $\delta D(D_2O)$ (isotope control) in plants (plates with receiver plants)                 | 0.0006808  |            |
| One-sided Student's t-test | $\delta^{13}C(AA)$ ( <i>Mucor hiemalis</i> ) in soils (plates without receiver plants)    | $\delta^{13}C(AA)$ (Natural abundance control) in soils (plates with receiver plants)      | 0.05391    |            |
| One-sided Welch's t-test   | $\delta D(D_2O)$ ( <i>Trichoderma viride</i> ) in plants (plates without receiver plants) | $\delta D(D_2O)$ (Natural abundance control) in plants (plates with receiver plants)       | 0.04365    |            |
| One-sided Student's t-test | $\delta^{13}C(AA)$ ( <i>Trichoderma viride</i> ) in plants (plates with receiver plants)  | $\delta^{13}C(AA)$ (Natural abundance control) in plants (plates with receiver plants)     | 0.04962    |            |
| One-sided Student's t-test | $\delta^{15}N(AA)$ ( <i>Fusarium temperatum</i> ) in plants (plates with receiver plants) | $\delta^{15}N(AA)$ (Natural abundance control) in plants (plates with receiver plants)     | 0.01683    |            |
| One-sided Student's t-test | $\delta^{15}N(AA)$ ( <i>Fusarium temperatum</i> ) in soils (plates with receiver plants)  | $\delta^{15}N(AA)$ (Natural abundance control) in soils (plates with receiver plants)      | 0.001306   |            |
| One-sided Student's t-test | $\delta^{15}N(AA)$ ( <i>Mucor hiemalis</i> ) in soils (plates with receiver plants)       | $\delta^{15}N(AA)$ (Natural abundance control) in soils (plates with receiver plants)      | 0.006907   |            |
| One-sided Student's t-test | $\delta D(D_2O)$ ( <i>Fusarium temperatum</i> ) in soils (plates with receiver plants)    | $\delta D(D_2O)$ (Natural abundance control) in soils (plates with receiver plants)        | 0.00001287 |            |
| One-sided Welch's t-test   | $\delta D(D_2O)$ ( <i>Mucor hiemalis</i> ) in soils (plates with receiver plants)         | $\delta D(D_2O)$ (Natural abundance control) in soils (plates with receiver plants)        | 0.04282    |            |
| One-sided Welch's t-test   | $\delta D(D_2O)$ ( <i>Fusarium temperatum</i> ) in plants (plates with receiver plants)   | $\delta D(D_2O)$ (Natural abundance control) in plants (plates with receiver plants)       | 0.002062   |            |
| One-sided Welch's t-test   | $\delta D(D_2O)$ ( <i>Mucor hiemalis</i> ) in plants (plates with receiver plants)        | $\delta D(D_2O)$ (Natural abundance control) in plants (plates with receiver plants)       | 0.001896   |            |
| One-sided Welch's t-test   | $\delta D(D_2O)$ ( <i>Trichoderma viride</i> ) in plants (plates with receiver plants)    | $\delta D(D_2O)$ (Natural abundance control) in plants (plates with receiver plants)       | 0.01153    |            |

**Supplement Table 2: Statistical values (ANOVAs).** Table of ANOVAs and Kruskal-Wallis rank sum tests showing the data that has been tested for fungal species effects compared to the natural abundance control and corresponding p-values (blue means  $p \leq 0.05$ ; violet means  $p \leq 0.01$ ).

| Statistical method           | Data                                                       | Comparison     | p         |
|------------------------------|------------------------------------------------------------|----------------|-----------|
| ANOVA                        | $\delta D$ in soils (plates without receiver plants)       | Fungal species | 0.0266    |
| Kruskal-Wallis rank sum test | $\delta D$ in soils (plates without receiver plants)       | Fungal species | 0.0485    |
| ANOVA                        | Total plant nitrogen                                       | Fungal species | 0.001038  |
| ANOVA                        | $\delta^{13}C(AA)$ in plants (plates with receiver plants) | Fungal species | 0.05292   |
| ANOVA                        | $\delta^{15}N(AA)$ in soils (plates with receiver plants)  | Fungal species | 0.01      |
| ANOVA                        | $\delta D(D_2O)$ in plants (plates with receiver plants)   | Fungal species | 0.02039   |
| ANOVA                        | $\delta D(D_2O)$ in soils (plates with receiver plants)    | Fungal species | 0.0004977 |
| Kruskal-Wallis rank sum test | $\delta D(D_2O)$ in soils (plates with receiver plants)    | Fungal species | 0.0001153 |
